# Supplementary material for: Prediction of Poly(A) Sites by Poly(A) Read Mapping
Source: PubMed Central journal article supplement (PMC5279776; doi:10.1371/journal.pone.0170914), 2017-01-30
Supplement: pone.0170914.s003.pdf [file pone.0170914.s003.pdf]

**Table S1**

This table shows PPV and sensitivity determined from the RNA-PET gold standard sets obtained either by mapping the data with ContextMap 2 (abbreviated as CM) or by using the original ENCODE mapping (abbreviated as ENC). In addition, differences in PPV and sensitivity are indicated. Positive values indicate that PPV or sensitivity are higher if the ContextMap 2 RNA-PET mapping is used to determine the gold standard set instead of the ENCODE RNA-PET mapping and negative values indicate that they decrease.

| Data set | Pred. method | RNA-seq rep. | RNA-PET rep. | PPV (CM) | PPV (ENC) | Diff.  | Sens. (CM) | Sens. (ENC) | Diff.  |
|----------|--------------|--------------|--------------|----------|-----------|--------|------------|-------------|--------|
| MCF-7    |              |              |              |          |           |        |            |             |        |
|          | ContextMap   | 1            | 1            | 0.764    | 0.71      | 0.054  | 0.043      | 0.046       | -0.002 |
|          | ContextMap   | 1            | 2            | 0.802    | 0.748     | 0.053  | 0.044      | 0.046       | -0.002 |
|          | ContextMap   | 2            | 1            | 0.78     | 0.725     | 0.054  | 0.047      | 0.049       | -0.003 |
|          | ContextMap   | 2            | 2            | 0.818    | 0.764     | 0.054  | 0.047      | 0.05        | -0.003 |
|          | KLEAT        | 1            | 1            | 0.684    | 0.617     | 0.067  | 0.055      | 0.056       | -0.001 |
|          | KLEAT        | 1            | 2            | 0.711    | 0.648     | 0.063  | 0.055      | 0.057       | -0.002 |
|          | KLEAT        | 2            | 1            | 0.654    | 0.589     | 0.065  | 0.058      | 0.06        | -0.001 |
|          | KLEAT        | 2            | 2            | 0.68     | 0.619     | 0.061  | 0.058      | 0.06        | -0.002 |
| A549     |              |              |              |          |           |        |            |             |        |
|          | ContextMap   | 1            | 1            | 0.943    | 0.908     | 0.036  | 0.032      | 0.032       | 0      |
|          | ContextMap   | 1            | 2            | 0.936    | 0.9       | 0.037  | 0.03       | 0.033       | -0.002 |
|          | ContextMap   | 2            | 1            | 0.896    | 0.852     | 0.044  | 0.073      | 0.073       | 0      |
|          | ContextMap   | 2            | 2            | 0.887    | 0.839     | 0.048  | 0.069      | 0.073       | -0.004 |
|          | KLEAT        | 1            | 1            | 0.745    | 0.678     | 0.067  | 0.052      | 0.05        | 0.002  |
|          | KLEAT        | 1            | 2            | 0.74     | 0.67      | 0.07   | 0.049      | 0.05        | -0.001 |
|          | KLEAT        | 2            | 1            | 0.815    | 0.753     | 0.062  | 0.08       | 0.077       | 0.002  |
|          | KLEAT        | 2            | 2            | 0.806    | 0.742     | 0.064  | 0.076      | 0.078       | -0.002 |
| H1-hESC  |              |              |              |          |           |        |            |             |        |
|          | ContextMap   | 1            | 1            | 0.754    | 0.777     | -0.024 | 0.082      | 0.027       | 0.056  |
|          | ContextMap   | 2            | 1            | 0.774    | 0.792     | -0.018 | 0.068      | 0.022       | 0.046  |
|          | KLEAT        | 1            | 1            | 0.453    | 0.486     | -0.032 | 0.114      | 0.038       | 0.076  |
|          | KLEAT        | 2            | 1            | 0.395    | 0.429     | -0.034 | 0.094      | 0.032       | 0.062  |
