# Supplementary material for: Prediction of Poly(A) Sites by Poly(A) Read Mapping
Source: PubMed Central journal article supplement (PMC5279776; doi:10.1371/journal.pone.0170914), 2017-01-30
Supplement: pone.0170914.s004.pdf [file pone.0170914.s004.pdf]

**Table S2**

PPV and sensitivity for poly(A) site predictions by ContextMap 2 and KLEAT for the MCF-7 RNA-seq data using gold standard sets obtained from the SAPAS data on MCF-7 from the study of Fu et al. For this table, mapping of the SAPAS data was performed using ContextMap 2.

| <b>Method</b> | <b>Rep.</b> | <b># Preds.</b> | <b>PPV</b> | <b>Sens.</b> |
|---------------|-------------|-----------------|------------|--------------|
| ContextMap 2  | 1           | 11,114          | 0.236      | 0.128        |
| ContextMap 2  | 2           | 11,690          | 0.247      | 0.140        |
| KLEAT         | 1           | 15,671          | 0.167      | 0.128        |
| KLEAT         | 2           | 17,353          | 0.158      | 0.133        |
