# Supplementary material for: Prediction of Poly(A) Sites by Poly(A) Read Mapping
Source: PubMed Central journal article supplement (PMC5279776; doi:10.1371/journal.pone.0170914), 2017-01-30
Supplement: pone.0170914.s005.pdf [file pone.0170914.s005.pdf]

**Table S3**

This table shows PPV and sensitivity determined from the RNA-PET gold standard sets obtained either by mapping the data with ContextMap 2 (abbreviated as CM) or BWA. In addition, differences in PPV and sensitivity are indicated. Positive values indicate that PPV or sensitivity are higher if the ContextMap 2 RNA-PET mapping is used to determine the gold standard set instead of the BWA RNA-PET mapping and negative values indicate that they decrease.

| Data set | Pred. method | RNA-seq rep. | RNA-PET rep. | PPV (CM) | PPV (BWA) | Diff. | Sens. (CM) | Sens. (BWA) | Diff.  |
|----------|--------------|--------------|--------------|----------|-----------|-------|------------|-------------|--------|
| MCF-7    |              |              |              |          |           |       |            |             |        |
|          | ContextMap   | 1            | 1            | 0.764    | 0.637     | 0.127 | 0.043      | 0.043       | 0      |
|          | ContextMap   | 1            | 2            | 0.802    | 0.69      | 0.111 | 0.044      | 0.045       | -0.001 |
|          | ContextMap   | 2            | 1            | 0.78     | 0.656     | 0.124 | 0.047      | 0.047       | 0      |
|          | ContextMap   | 2            | 2            | 0.818    | 0.706     | 0.111 | 0.047      | 0.049       | -0.001 |
|          | KLEAT        | 1            | 1            | 0.684    | 0.554     | 0.13  | 0.055      | 0.053       | 0.002  |
|          | KLEAT        | 1            | 2            | 0.711    | 0.595     | 0.116 | 0.055      | 0.055       | 0      |
|          | KLEAT        | 2            | 1            | 0.654    | 0.527     | 0.128 | 0.058      | 0.056       | 0.003  |
|          | KLEAT        | 2            | 2            | 0.68     | 0.562     | 0.118 | 0.058      | 0.057       | 0.001  |
| A549     |              |              |              |          |           |       |            |             |        |
|          | ContextMap   | 1            | 1            | 0.943    | 0.852     | 0.091 | 0.032      | 0.041       | -0.009 |
|          | ContextMap   | 1            | 2            | 0.936    | 0.834     | 0.102 | 0.03       | 0.038       | -0.007 |
|          | ContextMap   | 2            | 1            | 0.896    | 0.73      | 0.166 | 0.073      | 0.084       | -0.011 |
|          | ContextMap   | 2            | 2            | 0.887    | 0.709     | 0.178 | 0.069      | 0.077       | -0.008 |
|          | KLEAT        | 1            | 1            | 0.745    | 0.642     | 0.102 | 0.052      | 0.063       | -0.011 |
|          | KLEAT        | 1            | 2            | 0.74     | 0.629     | 0.111 | 0.049      | 0.058       | -0.009 |
|          | KLEAT        | 2            | 1            | 0.815    | 0.661     | 0.154 | 0.08       | 0.091       | -0.011 |
|          | KLEAT        | 2            | 2            | 0.806    | 0.645     | 0.161 | 0.076      | 0.084       | -0.009 |
| H1-hESC  |              |              |              |          |           |       |            |             |        |
|          | ContextMap   | 1            | 1            | 0.754    | 0.59      | 0.164 | 0.082      | 0.057       | 0.026  |
|          | ContextMap   | 2            | 1            | 0.774    | 0.634     | 0.14  | 0.068      | 0.049       | 0.019  |
|          | KLEAT        | 1            | 1            | 0.453    | 0.357     | 0.096 | 0.114      | 0.079       | 0.035  |
|          | KLEAT        | 2            | 1            | 0.395    | 0.33      | 0.065 | 0.094      | 0.069       | 0.025  |
